# Supplementary material for: Mental Health Outcomes of an Applied Game for Children with Elevated Anxiety Symptoms: A Randomized Controlled Non-inferiority Trial
Source: Springer Nature journal article supplement (doi:10.1007/s10826-020-01728-y), 2020-06-24
Supplement: MOESM1 [file 18117514]

**Supplementary Material A**

*Pre-test and change in secondary outcomes over the study (Completers Only Sample)*

| Assessment | MindLight | CBT | Mean differencea | SD | 95 % CI | |
| --- | --- | --- | --- | --- | --- | --- |
| Social self-efficacy | | | | | |
| Pre-test | 2.34 | 2.28 |  |  |  | |
| Post-test – pre-testb | 0.21 | 0.22 | 0.01 | 0.62 | [-0.10, 0.11] d | |
| 3-months FU – pre-testb | 0.31 | 0.31 | -0.01 | 0.62 | [-0.11, 0.10] d | |
| 6-months FU – pre-testb | 0.39 | 0.34 | -0.05 | 0.65 | [-0.16, 0.06] d | |
| *n* | 82 | 83 |  |  |  | |
| Emotional self-efficacy | | | | | |
| Pre-test | 1.84 | 1.84 |  |  |  | |
| Post-test – pre-test b | 0.26 | 0.36 | 0.10 | 0.73 | [-0.03, 0.22] d | |
| 3-months FU – pre-test b | 0.41 | 0.50 | 0.09 | 0.73 | [-0.03, 0.22] d | |
| 6-months FU – pre-test b | 0.55 | 0.52 | -0.03 | 0.84 | [-0.17, 0.11] d | |
| *n* | 82 | 83 |  |  |  | |
| Academic self-efficacy | | | | | |
| Pre-test | 2.43 | 2.28 |  |  |  | |
| Post-test – pre-test b | 0.19 | 0.26 | 0.08 | 0.55 | [-0.02, 0.17] d | |
| 3-months FU – pre-test b | 0.31 | 0.34 | 0.03 | 0.61 | [-0.07, 0.14] d | |
| 6-months FU – pre-test b | 0.24 | 0.36 | 0.12 | 0.59 | [0.01, 0.22] e | |
| *n* | 79 | 78 |  |  |  | |
| Internalizing problems | | | | | |
| Pre-test | 4.58 | 4.62 |  |  |  | |
| Post-test – pre-test c | -1.28 | -0.93 | -0.35 | 2.46 | [-0.77, 0.07] d | |
| 3-months FU – pre-test c | -1.31 | -1.56 | 0.25 | 2.34 | [-0.16, 0.65] d | |
| 6-months FU – pre-test c | -1.68 | -1.35 | -0.33 | 2.83 | [-0.83, 0.18] d | |
| *n* | 67 | 66 |  |  |  | |
| Externalizing problems | | | | | |
| Pre-test | 5.42 | 5.87 |  |  |  | |
| Post-test – pre-test c | -0.48 | -1.09 | 0.61 | 2.17 | [0.24, 0.97] f | |
| 3-months FU – pre-test c | -0.63 | -0.76 | 0.12 | 2.23 | [-0.26, 0.51] d | |
| 6-months FU – pre-test c | -0.63 | -1.06 | 0.43 | 2.37 | [0.01, 0.85] f | |
| *n* | 67 | 66 |  |  |  | |

*Note*. CI = confidence interval.

a A negative difference is a difference in favor of MindLight. b A positive score means an increase in self-efficacy. c A negative score means a decrease in problems. d The 95 % CI of the difference in change in secondary outcome lies entirely between the equivalence margins, indicating equivalence of MindLight and CBT. e The 95 % CI of the difference in change in secondary outcome lies entirely to the left of zero, indicating significant differences in favor of MindLight. f The 95 % CI of the difference in change in secondary outcome lies entirely to the right of zero, indicating significant differences in favor of CBT.

**Supplementary Material B**

*Linear growth model fit indices for secondary outcomes, from pre-test to 6-months follow-up (Intention-to-Treat Sample)*

|  | χ2 (*df*) | *p* | RMSEA | CFI | TLI |
| --- | --- | --- | --- | --- | --- |
| Social self-efficacy | 11.29 (5) | .046 | 0.09 | 0.97 | 0.97 |
| Emotional self-efficacy | 13.73 (5) | .017 | 0.10 | 0.96 | 0.95 |
| Academic self-efficacy | 15.60 (5) | .008 | 0.11 | 0.96 | 0.95 |
| Internalizing problems | 22.09 (5) | <.001 | 0.14 | 0.94 | 0.93 |
| Externalizing problems | 12.61 (5) | .027 | 0.10 | 0.98 | 0.98 |

Note: RMSEA = root mean square error of approximation; CFI = comparative fit index; TLI = Tucker-Lewis Index.

**Supplementary Material C**

*Linear model fit indices and linear regression predicting growth parameters of linear growth model of secondary outcomes by program, from pre-test to 6-months follow-up (Intention-to-Treat Sample)*

|  |  |  |  |  |  | Outcome | | | | | | |
| --- | --- | --- | --- | --- | --- | --- | --- | --- | --- | --- | --- | --- |
|  |  |  |  |  |  | Intercept | | |  | Linear slope | | |
|  | χ2 (*df*) | *p* | RMSEA | CFI | TLI | B | SE | *t* |  | B | SE | *t* |
| Social self-efficacy | 11.82 (7) | .107 | 0.07 | 0.98 | 0.97 | 0.04 | 0.098 | 0.36 |  | 0.06 | 0.151 | 0.42 |
| Emotional self-efficacy | 15.08 (7) | .035 | 0.08 | 0.96 | 0.95 | -0.05 | 0.114 | -0.43 |  | 0.05 | 0.198 | 0.23 |
| Academic self-efficacy | 16.33 (7) | .022 | 0.09 | 0.97 | 0.95 | 0.13 | 0.105 | 1.25 |  | -0.11 | 0.141 | -0.80 |
| Internalizing problems | 23.89 (7) | .001 | 0.12 | 0.95 | 0.93 | -0.05 | 0.534 | -0.09 |  | 0.04 | 0.691 | 0.06 |
| Externalizing problems | 15.66 (7) | .028 | 0.09 | 0.98 | 0.97 | -0.09 | 0.557 | -0.17 |  | 0.26 | 0.599 | 0.44 |

Note: *** *p* < 0.001; ** *p* < 0.010, two-tailed tests. RMSEA = root mean square error of approximation; CFI = comparative fit index; TLI = Tucker-Lewis Index; SE = standard error.

**Supplementary Material D**

*Linear growth model growth curve parameters for secondary outcomes, from pre-test to 6-months follow-up (Completers Only sample)*

|  | Means | | | | | | |  | Variances | | | | | | |
| --- | --- | --- | --- | --- | --- | --- | --- | --- | --- | --- | --- | --- | --- | --- | --- |
|  | Intercept | | |  | Slope | | |  | Intercept | | |  | Slope | | |
|  | B | SE | *t* |  | B | SE | *t* |  | B | SE | *t* |  | B | SE | *t* |
| Social self-efficacy | 2.36 | 0.05 | 48.86*** |  | 0.50 | 0.08 | 6.44*** |  | 0.26 | 0.05 | 4.87*** |  | 0.33 | 0.19 | 1.80 |
| Emotional self-efficacy | 1.92 | 0.06 | 33.99*** |  | 0.73 | 0.10 | 7.07*** |  | 0.30 | 0.07 | 4.52*** |  | 0.49 | 0.33 | 1.48 |
| Academic self-efficacy | 2.41 | 0.05 | 45.68*** |  | 0.42 | 0.08 | 5.45*** |  | 0.34 | 0.05 | 6.42*** |  | 0.18 | 0.18 | 0.99 |
| Internalizing problems | 4.36 | 0.27 | 16.06*** |  | -2.00 | 0.35 | -5.63*** |  | 8.96 | 1.37 | 6.54*** |  | 7.07 | 4.00 | 1.77 |
| Externalizing problems | 5.43 | 0.28 | 19.10*** |  | -1.00 | 0.31 | -3.28** |  | 10.35 | 1.75 | 5.90*** |  | 2.44 | 2.33 | 1.05 |

*Note.* SE = standard error.

*** *p* < 0.001; ** *p* < 0.010, two-tailed tests.

**Supplementary Material E**

*Linear regression predicting growth parameters of quadratic growth model of anxiety by mental health predictors at pre-test separate for child-reported anxiety and mother-reported anxiety (Completers Only Sample)*

|  |  | | |  | Outcome | | |  |  | | |
| --- | --- | --- | --- | --- | --- | --- | --- | --- | --- | --- | --- |
|  | Intercept anxiety | | |  | Linear slope anxiety | | |  | Quadratic slope anxiety | | |
| Predictor | *B* | SE | *t* |  | *B* | SE | *t* |  | *B* | SE | *t* |
| Anxiety (child report) |  |  |  |  |  |  |  |  |  |  |  |
| Baseline anxiety (mother report) | 0.35 | 0.14 | 2.52* |  | 0.01 | 0.54 | 0.01 |  | 0.09 | 0.67 | 0.13 |
| Social self-efficacy | -0.17 | 0.05 | -3.34** |  | 0.08 | 0.26 | 0.31 |  | 0.07 | 0.32 | 0.22 |
| Emotional self-efficacy | -0.23 | 0.04 | -5.79*** |  | -0.02 | 0.20 | -0.08 |  | 0.23 | 0.26 | 0.88 |
| Academic self-efficacy | -0.22 | 0.05 | -4.47*** |  | 0.09 | 0.22 | 0.41 |  | 0.17 | 0.26 | 0.64 |
| Depression mother | -0.00 | 0.02 | -0.06 |  | 0.10 | 0.07 | 1.35 |  | -0.16 | 0.08 | -1.91 |
| Anxiety mother | 0.02 | 0.03 | 0.75 |  | -0.01 | 0.13 | -0.10 |  | 0.03 | 0.15 | 0.23 |
| Stress mother | 0.00 | 0.01 | 0.11 |  | -0.01 | 0.05 | -0.25 |  | 0.01 | 0.06 | 0.14 |
| Anxiety (mother report) |  |  |  |  |  |  |  |  |  |  |  |
| Baseline anxiety (child report) | 0.09 | 0.05 | 1.78 |  | 0.06 | 0.18 | 0.32 |  | -0.06 | 0.24 | -0.23 |
| Social self-efficacy | -0.02 | 0.03 | -0.48 |  | -0.06 | 0.11 | -0.59 |  | -0.08 | 0.15 | -0.53 |
| Emotional self-efficacy | -0.03 | 0.03 | -1.03 |  | -0.13 | 0.09 | -1.48 |  | 0.11 | 0.12 | 0.89 |
| Academic self-efficacy | -0.02 | 0.03 | -0.79 |  | -0.14 | 0.11 | -1.25 |  | 0.19 | 0.16 | 1.19 |
| Depression mother | 0.03 | 0.01 | 2.57* |  | -0.05 | 0.03 | -1.66 |  | 0.05 | 0.04 | 1.40 |
| Anxiety mother | 0.05 | 0.02 | 2.73** |  | -0.01 | 0.06 | -0.21 |  | 0.01 | 0.07 | 0.09 |
| Stress mother | 0.02 | 0.01 | 3.64*** |  | -0.03 | 0.02 | -1.25 |  | 0.02 | 0.03 | 0.88 |

*Note.* SE = standard error.

*** *p* < 0.001; ** *p* < 0.010; * *p* < 0.050, two-tailed tests.
